# Supplementary material
Source: publisher site journal article supplement (https://www.dovepress.com/article/260804)
Supplement: Supplementary file 1 [file get_supplementary_file.php]

| **Supplementary Table 1. Antibiotic non-susceptible patterns** | | | | | | | | | | |
| --- | --- | --- | --- | --- | --- | --- | --- | --- | --- | --- |
| **Antibiotic agents** | **Number(%) of non-susceptible rate** | | | | | | | | | |
| All isolates | CO-KP | CA-KP | HCA-KP | CO-EC | CA-EC | HCA-EC | CO-other | CA-other | HCA-other |
| (n=28) | (n=15) | (n=9) | (n=6) | (n=8) | (n=5) | (n=3) | (n=5) | (n=1) | (n=4) |
| **Ampicillin/sulbactam** | 28(100.0) | 15(100.0) | 9(100.0) | 6(100.0) | 8(100.0) | 5(100.0) | 3(100.0) | 5(100.0) | 1(100.0) | 4(100.0) |
| **Ceftazidime/avibactam** | 12(42.9) | 2(13.3) | 1(11.1) | 1(16.7) | 8(100.0) | 5(100.0) | 3(100.0) | 2(40.0) | 1(100.0) | 1(25.0) |
| **Piperacillin/tazobactam** | 25(89.3) | 14(93.3) | 8(88.9) | 6(100.0) | 7(87.5) | 4(80.0) | 3(100.0) | 4(80.0) | 1(100.0) | 3(75.0) |
| **Cefepime** | 26(92.9) | 15(100.0) | 9(100.0) | 6(100.0) | 8(100.0) | 5(100.0) | 3(100.0) | 3(60.0) | 1(100.0) | 2(50.0) |
| **Cefotaxime** | 28(100.0) | 15(100.0) | 9(100.0) | 6(100.0) | 8(100.0) | 5(100.0) | 3(100.0) | 5(100.0) | 1(100.0) | 4(100.0) |
| **Cefoxitin** | 28(100.0) | 15(100.0) | 9(100.0) | 6(100.0) | 8(100.0) | 5(100.0) | 3(100.0) | 5(100.0) | 1(100.0) | 4(100.0) |
| **Cefuroxime** | 28(100.0) | 15(100.0) | 9(100.0) | 6(100.0) | 8(100.0) | 5(100.0) | 3(100.0) | 5(100.0) | 1(100.0) | 4(100.0) |
| **Ceftazidime** | 27(96.4) | 15(100.0) | 9(100.0) | 6(100.0) | 8(100.0) | 5(100.0) | 3(100.0) | 4(80.0) | 1(100.0) | 3(75.0) |
| **Aztreonam** | 21(75.0) | 15(100.0) | 9(100.0) | 6(100.0) | 3(37.5) | 2(40.0) | 1(33.3) | 3(60.0) | 0(0.0) | 3(75.0) |
| **Ertapenem** | 28(100.0) | 15(100.0) | 9(100.0) | 6(100.0) | 8(100.0) | 5(100.0) | 3(100.0) | 5(100.0) | 1(100.0) | 4(100.0) |
| **Imipenem** | 21(75.0) | 14(93.3) | 9(100.0) | 5(83.3) | 5(62.5) | 3(60.0) | 2(66.7) | 2(40.0) | 0(0.0) | 2(50.0) |
| **Meropenem** | 22(78.6) | 14(93.3) | 9(100.0) | 5(83.3) | 5(62.5) | 3(60.0) | 2(66.7) | 3(60.0) | 0(0.0) | 3(75.0) |
| **Gentamicin** | 19(67.9) | 11(73.3) | 7(77.8) | 4(66.7) | 4(50.0) | 3(60.0) | 1(33.3) | 4(80.0) | 1(100.0) | 3(75.0) |
| **Amikacin** | 12(42.9) | 9(60.0) | 6(66.7) | 3(50.0) | 1(12.5) | 1(20.0) | 0(0.0) | 2(40.0) | 1(100.0) | 1(25.0) |
| **Ciprofloxacin** | 25(89.3) | 15(100.0) | 9(100.0) | 6(100.0) | 5(62.5) | 3(60.0) | 2(66.7) | 5(100.0) | 1(100.0) | 4(100.0) |
| **Levofloxacin** | 24(85.7) | 15(100.0) | 9(100.0) | 6(100.0) | 5(62.5) | 3(60.0) | 2(66.7) | 4(80.0) | 1(100.0) | 3(75.0) |
| **Sulfamethoxazole** | 19(67.9) | 11(73.3) | 6(66.7) | 5(83.3) | 5(62.5) | 3(60.0) | 2(66.7) | 3(60.0) | 1(100.0) | 2(50.0) |
| **Chloramphenicol** | 20(71.4) | 14(93.3) | 8(88.9) | 6(100.0) | 2(25.0) | 2(40.0) | 0(0.0) | 4(80.0) | 1(100.0) | 3(75.0) |
| **Colistin/polymyxin** | 1(3.6) | 1(6.7) | 1(11.1) | 0(0.0) | 0 | 0(0.0) | 0(0.0) | 0(0.0) | 0(0.0) | 0(0.0) |
| **Tigecycline** | 14(50) | 7(46.7) | 4(44.4) | 3(50.0) | 6(75) | 5(100.0) | 1(33.3) | 1(20.0) | 1(100.0) | 0(0.0) |

**Notes:** CA-other including 1 *C. freundii,* HCA-other including 2 *E. cloacae*, 1 *C. freundii* and1 *E. asburiae*, CO-other is the sum of CA-other and HCA-other.
